# Supplementary material for: Two-dimensional self-assembly of single-, poly- and co-crystals at the liquid/solid interface
Source: Royal Society of Chemistry journal article supplement (doi:10.1039/c4ce01183j), 2014-01-01
Supplement: c4ce01183j1.pdf [file c4ce01183j1.pdf]

## Supplementary Information

### Two-dimensional self-assembly of single-crystal, poly-crystal and co-crystal at the liquid/solid interface

Pei Liu, Xinrui Miao\*, Zhuomin Li, Bao Zha, Wenli Deng\*

College of Materials Science and Engineering, South China University of Technology,  
Guangzhou 510640, China

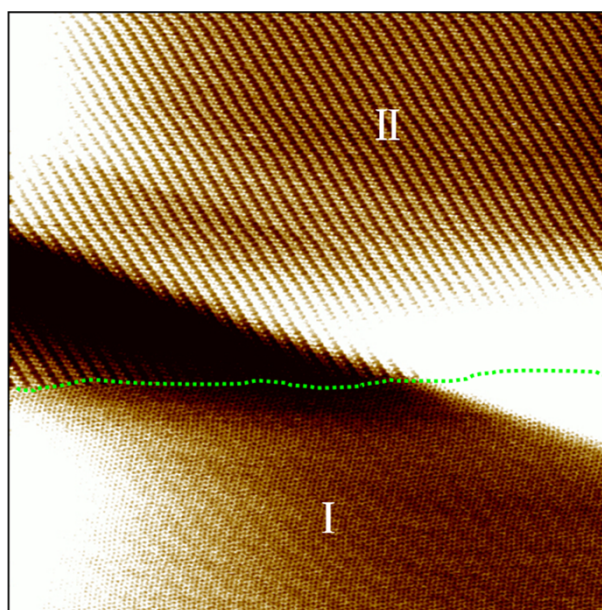

**Fig. S1** Large-scale STM image of C2 self-assembly at 1-phenyloctane/ HOPG interface showing the coexistence of two types of structures (Type I and Type II). Scan area: 200 nm × 200 nm; Tunneling conditions:  $V_{\text{bias}} = 764$  mV,  $I_t = 482$  pA.
